# Supplementary material for: A Five-lncRNAs Signature-Derived Risk Score Based on TCGA and CGGA for Glioblastoma: Potential Prospects for Treatment Evaluation and Prognostic Prediction
Source: Front Oncol. 2020 Dec 17;10:590352. doi: 10.3389/fonc.2020.590352 (PMC7773845; doi:10.3389/fonc.2020.590352)
Supplement: Supplementary Table 4 — The related signaling pathways of the 5-lncRNAs signature. [file DataSheet_4.xlsx]

## Sheet: Table S
ID	Description	setSize	enrichmentScore	NES	pvalue	p.adjust	qvalues	rank	leading_edge	core_enrichment
WP4172	PI3K-Akt Signaling Pathway	51	0.434425	1.93289	0.00141243	0.012082	0.00749446	789	tags=63%, list=32%, signal=44%	1293/4233/3569/1440/3559/3381/7057/3718/1277/3575/3675/3912/1292/1278/3690/9180/3667/3678/3566/22801/7424/3676/7097/1435/1291/898/2250/3693/2260/2335/3909/3570
WP2882	Nuclear Receptors Meta-Pathway	48	0.466236	2.04729	0.00141844	0.012082	0.00749446	518	tags=48%, list=21%, signal=39%	5743/7421/3589/6364/330/8714/51129/1545/6515/7056/6347/6591/7128/26509/27286/5265/6533/8553/55630/4791/2289/23764/3084
WP3932	Focal Adhesion-PI3K-Akt-mTOR-signaling pathway	49	0.43208	1.90509	0.00142248	0.012082	0.00749446	415	tags=43%, list=17%, signal=36%	4233/1289/1440/3559/3381/7057/3718/1277/3575/6515/3675/3912/1292/1278/3690/9180/3667/3678/3566/22801/7424
WP3888	VEGFA-VEGFR2 Signaling Pathway	42	0.477105	2.02683	0.00145773	0.012082	0.00749446	1024	tags=76%, list=41%, signal=46%	22943/5743/5329/3383/2274/6347/9047/5328/9510/3690/6461/857/4688/653361/4323/6464/6778/5580/2317/3693/51564/3984/7414/5777/4627/5606/5829/8826/5780/4790/6722/3315
WP2877	Vitamin D Receptor Pathway	36	0.539545	2.20675	0.00146413	0.012082	0.00749446	485	tags=56%, list=20%, signal=45%	768/7421/54210/1305/50486/7056/6279/7128/727936/3684/7292/126364/240/6280/6275/2050/283229/1474/623/29785
WP236	Adipogenesis	26	0.546116	2.02768	0.0015456	0.012082	0.00749446	853	tags=81%, list=34%, signal=54%	3976/56729/3569/5054/9021/688/3667/123/8321/8651/2625/1051/1592/649/1052/6778/10555/10135/25937/4000/6720
WP2203	Thymic Stromal LymphoPoietin (TSLP) Signaling Pathway	15	0.617475	1.96671	0.00156495	0.012082	0.00749446	512	tags=67%, list=21%, signal=53%	3569/3559/3575/7292/85480/4791/5971/1154/2242/6356
WP395	IL-4 Signaling Pathway	16	0.597778	1.93747	0.00156986	0.012082	0.00749446	656	tags=75%, list=26%, signal=56%	3718/9021/9046/3667/8651/3566/2625/2242/1051/6464/3269/6778
WP2806	Human Complement System	23	0.588148	2.09934	0.00158479	0.012082	0.00749446	545	tags=70%, list=22%, signal=55%	2162/3381/7057/5329/3383/5806/3912/3690/133/2769/629/728/715/3426/716/7097
WP1449	Regulation of toll-like receptor signaling pathway	22	0.547845	1.93099	0.00158983	0.012082	0.00749446	1018	tags=86%, list=41%, signal=51%	3569/54210/5603/7128/8651/92610/4791/1154/1326/7097/9641/929/5777/5606/4615/7187/6696/148022/4790
WP3929	Chemokine signaling pathway	21	0.596931	2.06547	0.00159236	0.012082	0.00749446	657	tags=71%, list=26%, signal=53%	6374/2921/6354/6364/10563/3718/10344/5880/729230/6356/653361/6464/3702/2268/5580
WP3945	TYROBP Causal Network	21	0.568822	1.96821	0.00159236	0.012082	0.00749446	956	tags=90%, list=39%, signal=56%	2000/10312/3684/54502/4688/113277/6510/7133/3597/84695/9056/10184/3689/10019/3059/64764/170954/6776/6696
WP558	Complement and Coagulation Cascades	14	0.608369	1.88736	0.00160514	0.012082	0.00749446	517	tags=79%, list=21%, signal=63%	5329/5054/7056/5328/5265/629/728/715/3426/623/716
WP2911	miRNA targets in ECM and membrane receptors	10	0.669632	1.86743	0.00161551	0.012082	0.00749446	827	tags=100%, list=33%, signal=67%	1293/1289/7057/1292/1278/22801/1291/3693/2335/3915
WP3617	Photodynamic therapy-induced NF-kB survival signaling	11	0.704849	2.02048	0.00161812	0.012082	0.00749446	465	tags=73%, list=19%, signal=59%	5743/3569/330/3383/597/4791/5971/3552
WP4549	Fragile X Syndrome	11	-0.591288	-1.85799	0.00260417	0.0163432	0.0101377	350	tags=55%, list=14%, signal=47%	7915/2549/6529/23237/3751
WP3624	Lung fibrosis	15	0.596913	1.90122	0.00312989	0.0163432	0.0101377	549	tags=67%, list=22%, signal=52%	3569/1440/5806/6347/5328/5265/729230/1051/6356/7076
WP4341	Non-genomic actions of 1,25 dihydroxyvitamin D3	15	0.584372	1.86127	0.00312989	0.0163432	0.0101377	657	tags=67%, list=26%, signal=49%	7421/3569/5603/6347/64127/4791/5971/857/7097/5580
WP615	Senescence and Autophagy in Cancer	24	0.508559	1.8334	0.00312989	0.0163432	0.0101377	521	tags=50%, list=21%, signal=40%	3569/2919/7057/1277/5054/5328/3624/55630/1300/3552/1051/4323
WP15	Selenium Micronutrient Network	16	0.566087	1.83476	0.00313972	0.0163432	0.0101377	453	tags=50%, list=18%, signal=41%	5743/3569/3383/5054/6347/3949/240/4791
WP2374	Oncostatin M Signaling Pathway	17	0.584526	1.92964	0.00315956	0.0163432	0.0101377	538	tags=65%, list=22%, signal=51%	4322/3718/5054/9021/6347/9180/3667/3949/1051/6464/3491
WP560	TGF-beta Receptor Signaling	14	0.58812	1.82454	0.00321027	0.0163432	0.0101377	230	tags=43%, list=9%, signal=39%	3976/10468/7057/5054/860/3624
WP306	Focal Adhesion	43	0.410824	1.7565	0.00436047	0.0212336	0.0131712	1000	tags=74%, list=40%, signal=45%	4233/330/3381/7057/1277/3675/3912/1292/1278/3690/5880/3678/22801/2318/7424/857/3676/6464/2268/2317/3693/2335/3909/7414/3915/87/5829/58498/3371/6696/55742/2316
WP4559	Interactions between immune cells and microRNAs in tumor microenvironment	11	0.611888	1.754	0.00485437	0.0226537	0.0140521	453	tags=64%, list=18%, signal=52%	3559/29126/6347/406886/8651/3566/4791
WP61	Notch Signaling Pathway Netpath	10	-0.637057	-1.93672	0.00522193	0.0233943	0.0145115	104	tags=40%, list=4%, signal=38%	55502/10683/388585
WP4304	Oligodendrocyte Specification and differentiation(including remyelination), leading to Myelin Components for CNS	10	-0.596164	-1.81241	0.0078329	0.0329742	0.0204539	214	tags=80%, list=9%, signal=73%	5354/55553/116448/30812/4974/10215/429
WP366	TGF-beta Signaling Pathway	22	0.49552	1.74656	0.00794913	0.0329742	0.0204539	1114	tags=91%, list=45%, signal=51%	4233/7057/860/1278/3690/857/6464/5371/1601/2335/4739/5606/7048/3371/7040/3726/7071/57154/3725/6497
WP69	T-Cell antigen Receptor (TCR) Signaling Pathway	16	0.540597	1.75214	0.00941915	0.0350767	0.0217581	1091	tags=94%, list=44%, signal=53%	3569/3552/2625/1326/6464/3702/5580/3601/3604/10019/7040/10892/4790/8915/3725
WP2572	Primary Focal Segmental Glomerulosclerosis FSGS	18	0.530906	1.7793	0.00950872	0.0350767	0.0217581	1104	tags=94%, list=44%, signal=53%	22943/5329/4311/3675/3690/11346/3856/4643/7414/4627/64423/7040/23607/3987/55742/1514/7094
WP453	Inflammatory Response Pathway	10	0.63111	1.76	0.00969305	0.0350767	0.0217581	355	tags=60%, list=14%, signal=52%	3559/7057/1277/3912/1278/3566
WP176	Folate Metabolism	11	0.600663	1.72183	0.00970874	0.0350767	0.0217581	900	tags=91%, list=36%, signal=58%	3569/3383/5054/6347/3949/4791/1435/19/2352/335
WP455	GPCRs, Class A Rhodopsin-like	27	0.461473	1.75566	0.0120301	0.0421053	0.0261179	673	tags=63%, list=27%, signal=46%	624/2358/5031/2847/2825/2863/729230/3274/623/8111/5737/3269/6915/2827/1241/5732/5739
WP4336	ncRNAs involved in Wnt signaling in hepatocellular carcinoma	18	0.502748	1.68493	0.0126783	0.0430293	0.0266911	331	tags=50%, list=13%, signal=44%	22943/8061/6423/5328/4920/7472/8324/8325/8321
WP2064	Neural Crest Differentiation	14	-0.541592	-1.87046	0.0131926	0.043458	0.026957	55	tags=50%, list=2%, signal=49%	655/116448/10215/429/10683/388585
